# Supplementary material for: Cell isolation and Organoid Culture from Mouse Liver and Small Intestine
Source: Research Square preprint supplement (doi:10.21203/rs.3.rs-673633/v1), 2021-07-08
Supplement: Supplementary file 1 [file ef5b52d0ee41d3ae8dd5672e.docx]

**Supplementary Material**

**Cell isolation and organoid culture from mouse liver and small intestine**

Wenyi Chen1,2, Qigu Yao1,2, Ruo Wang1,2, Yanping Xu1,2, Jiong Yu1,2, Jian Wu1,2, Lanjuan Li1,2, Hongcui Cao†1,2,3

1 State Key Laboratory for the Diagnosis and Treatment of Infectious Diseases, Collaborative Innovation Center for Diagnosis and Treatment of Infectious Diseases, The First Affiliated Hospital, Zhejiang University School of Medicine, 79 Qingchun Rd., Hangzhou City 310003, China

2 National Clinical Research Center for Infectious Diseases, 79 Qingchun Rd., Hangzhou City 310003, China

3 Zhejiang Provincial Key Laboratory for Diagnosis and Treatment of Aging and Physic-chemical Injury Diseases, 79 Qingchun Rd, Hangzhou City 310003, China.

**†Corresponding author:**

Hongcui Cao, M.D.

State Key Laboratory for the Diagnosis and Treatment of Infectious Diseases, The First Affiliated Hospital, Zhejiang University School of Medicine, 79 Qingchun Rd., Hangzhou City 310003, China. Tel: 86-571-87236451; Fax: 86-571-87236459

E-mail: [hccao@zju.edu.cn](mailto:hccao@zju.edu.cn)

**MATERIALS**

**Table S1.** **Reagents of organoids culture and analysis.**

| Reagents and Materials | | |
| --- | --- | --- |
| PBS 1× | RuiSenBiotech | - |
| FBS | Gibico | 10099-141C |
| 4% (wt/vol) paraformaldehyde | Absin | abs9179-500mL |
| RNeasy Mini Kit | Qiagen | 74104 |
| DNeasy Blood & Tissue kit | Qiagen | 69506 |
| BSA | Sangon Biotech | A0332 |
| Histowax (58-60 ℃) | Hualingpai | A-11001 |

**Table S2.** **General Instruments of organoids culture and analysis.**

| General Instruments | | |
| --- | --- | --- |
| Biological safety cabinet | Baker company | MODEL: SG403A-HE-INT |
| Cell culture incubator | Thermo | STERI-CYCLE i160 |
| Bright-field microscope | Nikon | TS100 |
| High-speed centrifuge | Eppendorf | 5810 R |
| Water bath | Thermo Fisher Scientific | ISOTEMP 215 |
| Temperature-controlled shaker | SZ | ZHSY-50S |
| Low temperature shaker | Thermo | 888-213-1790 |
| Fine scissors | Suzhou Medical Equipment | MR-S231 |
| Two fine forceps | Shanghai Medical instrument | 180801 |
| Glass Pasteur pipette | Thermo | 10006021 |
| Centrifuge tubes | Thermo, Corning | 339652, CLS430791 |
| 1.5 mL Microcentrifuge tubes | Corning | MCT-150C |
| Soft Microcentrifuge tubes | Corning | MCT-200-C |
| 10-mm Petri dish | Corning | 353003 |
| 24-Well adherent culture plate | Corning | 353047 |
| Disposable sterilized syringe | Nantong Tiansheng Experimental Equipment | LTD, 10 mL and 1 mL |
| Sterile swabs | Huabao | Sterile type 80 mm |
| Ice box | Esky | 1257470 |
| 5 mL Flat-bottom glass tubes | Thermo Fisher Scientific | 11563542 |
| Tissue cassette | VWR | 720-0228 |
| Glass slides | Nantong Tiansheng Experimental Equipment | TS-PNSO23 |
| Coverslips | CITOTEST | 10212424C |

**Table S3. Antibodies of organoids analysis.**

| Antibodies | | |
| --- | --- | --- |
| Goat Anti-Rabbit IgG H&L (HRP) | Abcam | ab6721 |
| Rabbit Anti-Mouse IgG H&L (HRP) | Abcam | ab6728 |
| Recombinant Anti-Cytokeratin 7 antibody [EPR17078] | Abcam | ab181598 |
| Anti-Ki67 antibody [SP6] | Abcam | ab16667 |
| Anti-Cytokeratin 19 antibody [A53-B] | Abcam | ab194399 |
| Goat Anti-Rabbit IgG H&L (Alexa Fluor® 647) | Abcam | ab150083 |
| Goat anti-Mouse IgG (H+L) Cross-Adsorbed Secondary Antibody, Alexa Fluor 488 | Invitrogen | A-11001 |
| DAPI | BD Pharmingen | 564907 |

**Experimental procedures**

**I. Analysis of organoids: Isolation of DNA**

1. Perform the procedure in main text III 2) ~3) to remove the Matrigel.
2. Discard the supernatant, add ~1 mL precooled PBS 1× and pipette up and down three times. Transfer the mixture to 1.5 mL EP, and centrifuge at 250 g and 4°C for 4 min.
3. Resuspend organoids in PBS 1×, transfer them to a 1.5 mL EP tube, and centrifuge at 300 g and 4°C for 4 min.
4. Discard the supernatant and add 30 µL Direct-PCR solution and 0.5 µL proteinase K per sample.
5. Incubate at 60°C overnight.
6. Centrifuge at ≥ 8000 g at RT for 10 min.
7. DNA can be stored at 4°C.
8. If necessary, purify DNA using a DNA purification kit.

**II. Analysis of organoids: Isolation of RNA**

1. To collect organoids, follow steps I 1) ~3) to collect cell mass.
2. Remove the supernatant, add 350 µL RLT to each 1.5 mL microcentrifuge tube, and vortex-mix for 30 s.
3. To promote cell mass lysis, draw the mixtures at least 5 times through a sterile and without RNase syringe of No. 20 needle.
4. The mixtures can be stored at –80°C for 1 month.
5. RNA can be extracted following the RNeasy Mini Kit (Qiagen, Hilden, Germany) protocol guides.
